# Supplementary material for: Mesenchymal Stem/Stromal Cells in Stromal Evolution and Cancer Progression
Source: Stem Cells Int. 2015 Dec 21;2016:4824573. doi: 10.1155/2016/4824573 (PMC4699086; doi:10.1155/2016/4824573)
Supplement: Supplementary file 1 — Cell culture: Human bone marrow mesenchymal stromal cells (MSCs) and HEK 293T cells (ATCC, Manassas, VA, USA) were cultured in α-MEM 10% FBS α-MEM powder (Invitrogen cat#12000-014, Paisley, UK), defined “FBS” (HyClone cat#SH3007003M, Logan, UT, USA) supplemented with penicillin-streptomycin (Sigma, St Louis, MO, USA), glutamine (Invitrogen cat#25030024), and minimal essential amino acids, NEAA (Invitrogen cat#11140035). The α-MEM powder was dissolved to commercial cell culture level water (Sigma). Sodium carbonate (Sigma) (2.2g/l) was added before filtration. Condensed serum-free medium from confluent HEK 293T culture was added to the MSC. HEK 293T cells were used for co-culture because of their robust growth abilities and strong survival potential under severe cell stress. The treated MSCs (2x105 cells) were seeded with approximately 10-20 HEK 293T cells per 10-cm dish to allow the co-culture to continue for 4-6 passages. The dishes were passaged at 6-day intervals. Growth curve analysis: For the growth curve analysis 10,000 cells were seeded on 6-well plates and counted in triplicate in 12-hour intervals. Time-lapse imaging: Cells were grown in CO2-independent medium (Invitrogen) supplemented with 10% FBS, MEAA, penicillin streptomycin, and glutamine on prewarmed support for 7 days. Medium was refreshed on every 3 days. Cell growth and movements were monitored by time-lapse imaging (20x magnification) at 2-min intervals (Zeiss Axiovert 200M inverted microscope, Carl Zeiss, Oberkochen, Germany). [file 4824573.f1.zip]

Archive with 2 entries (2 files):
- Supplemental film 1_mpeg1video.mpg
- Supplemental film 2_mpeg1video.mpg
